# Supplementary material for: Epidemiological Characteristics of 2009 (H1N1) Pandemic Influenza Based on Paired Sera from a Longitudinal Community Cohort Study
Source: PLOS journal article supplement (doi:10.1371/journal.pmed.1000442), 2011-06-21
Supplement: S6 (10.1371/journal.pmed.1000442.s006) [file journal.pmed.1000442.s006]

**Table S2.** Characteristics of the study population compared with the population of Hong Kong.

| Characteristic Value      |                        | Hong Kong<br>(000s) <sup>4</sup> | Study (n=770, with 95% binomial<br>confidence bounds) <sup>4</sup> |
|---------------------------|------------------------|----------------------------------|--------------------------------------------------------------------|
| Age <sup>1</sup>          | 3 - 19                 | 1,154 ( 16.8% )                  | 112 ( 14.5% , [ 12.2% , 17.2% ] )                                  |
|                           | 20 - 39                | 2,105 ( 30.6% )                  | 146 ( 19.0% , [ 16.4% , 21.9% ] )                                  |
|                           | 40 - 59                | 2,367 ( 34.4% )                  | 381 ( 49.5% , [ 46.0% , 53.1% ] )                                  |
|                           | 60 and older           | 1,260 ( 18.3% )                  | 131 ( 17.0% , [ 14.5% , 19.9% ] )                                  |
|                           | Missing                | 0                                | 0                                                                  |
| Sex <sup>1</sup>          | Male                   | 3,300 ( 47.0% )                  | 307 ( 39.9% , [ 36.5% , 43.4% ] )                                  |
|                           | Female                 | 3,726 ( 53.0% )                  | 463 ( 60.1% , [ 56.7% , 63.6% ] )                                  |
|                           | Missing                | 0                                | 0                                                                  |
| Education <sup>2</sup>    | Kidergarten or lower   | 423 ( 7.1% )                     | 16 ( 2.1% , [ 1.3% , 3.4% ] )                                      |
|                           | Primary                | 1,084 ( 18.3% )                  | 128 ( 16.7% , [ 14.2% , 19.4% ] )                                  |
|                           | Secondary              | 3,505 ( 59.1% )                  | 479 ( 62.4% , [ 58.8% , 65.6% ] )                                  |
|                           | Bachelor or above      | 915 ( 15.4% )                    | 145 ( 18.9% , [ 16.3% , 21.8% ] )                                  |
|                           | Missing                | 711                              | 2                                                                  |
| Occupation <sup>2,3</sup> | Managers               | 567 ( 8.6% )                     | 109 ( 14.2% , [ 11.9% , 16.8% ] )                                  |
|                           | Clerks                 | 1,110 ( 16.8% )                  | 84 ( 10.9% , [ 8.9% , 13.3% ] )                                    |
|                           | Service                | 837 ( 12.7% )                    | 47 ( 6.1% , [ 4.6% , 8.0% ] )                                      |
|                           | Elementary             | 848 ( 12.8% )                    | 52 ( 6.8% , [ 5.2% , 8.8% ] )                                      |
|                           | Students               | 1,369 ( 20.7% )                  | 142 ( 18.4% , [ 15.9% , 21.4% ] )                                  |
|                           | Home makers and others | 1,881 ( 28.4% )                  | 336 ( 43.6% , [ 40.2% , 47.2% ] )                                  |
|                           | Missing                | 24                               | 0                                                                  |
| Family Size <sup>2</sup>  | 1                      | 368 ( 5.5% )                     | 32 ( 4.2% , [ 3.0% , 5.8% ] )                                      |
|                           | 2                      | 1,071 ( 16.1% )                  | 140 ( 18.2% , [ 15.6% , 21.1% ] )                                  |
|                           | 3                      | 1,551 ( 23.4% )                  | 207 ( 26.9% , [ 23.9% , 30.2% ] )                                  |
|                           | 4                      | 2,020 ( 30.4% )                  | 254 ( 33.0% , [ 17.4% , 23.0% ] )                                  |
|                           | 5                      | 1,069 ( 16.1% )                  | 105 ( 13.6% , [ 11.4% , 16.3% ] )                                  |
|                           | 6 or more              | 557 ( 8.4% )                     | 32 ( 4.2% , [ 3.0% , 5.8% ] )                                      |
|                           | Missing                | 0                                | 0                                                                  |
| District <sup>2</sup>     | Hong Kong Island       | 1,268 ( 19.1% )                  | 145 ( 18.8% , [ 16.3% , 21.8% ] )                                  |
|                           | Kowloon East           | 1,011 ( 15.2% )                  | 128 ( 16.6% , [ 13.9% , 19.2% ] )                                  |
|                           | Kowloon West           | 643 ( 9.7% )                     | 112 ( 14.5% , [ 12.3% , 17.2% ] )                                  |
|                           | NT East                | 1,588 ( 23.9% )                  | 228 ( 29.6% , [ 26.5% , 33.0% ] )                                  |
|                           | NT West and marine     | 1,988 ( 30.0% )                  | 157 ( 20.4% , [ 17.7% , 23.4% ] )                                  |
|                           | Missing                | 137                              | 0                                                                  |

<sup>1</sup>Age (n= 6,886 and sex (n=7,026), corrected to a thousand, are projected estimates from the Census and Statistics Department of the Hong Kong SAR Government, which is according to the Population By-census conducted, 2006.

<sup>2</sup>Education, occupation, family size and district are from the By-census conducted in 2006, and the total of the resident population was 6,636 thousand (totals do not always sum due to rounding).

<sup>3</sup>Some classes were aggregated: for "managers", managers, administrators and professionals; for "clerks", associate professionals and clerks; for "service workers", service workers, shop sales workers, craft and related workers; for "elementary", plant and machine operators and assemblers, elementary occupations, and skilled agricultural and fishery workers; "home-makers and others", home-makers, retirees, unclassified, and unemployed.

<sup>4</sup>Percentages do not include missing values.
